# Supplementary material for: Assessment of Coilia mystus and C. nasus in the Yangtze River Estuary, China, Using a Length-Based Approach
Source: MDPI journal article supplement (doi:10.3390/fishes7030095), 2022-04-19
Supplement: s1 [file s1]

## Supplementary Materials

### Assessment of *Coilia mystus* and *C. nasus* in the Yangtze River Estuary, China, using a length-based approach

Lu Zhai<sup>1</sup>, Zengguang Li<sup>1</sup>, Yongbin Hu<sup>1</sup>, Chengwei Huang<sup>1</sup>, Siquan Tian<sup>1</sup>, Rong Wan<sup>1\*</sup> and Daniel Pauly<sup>2</sup>

- 1) College of Marine Science, National Engineering Research Center for Oceanic Fisheries, The Key Laboratory of Sustainable Exploitation of Oceanic Fisheries Resources, Shanghai Ocean University, Shanghai 201306, China.
- 2) *Sea Around Us*, Institute for the Oceans and Fisheries, University of British Columbia, Vancouver, B.C., Canada.

\* Corresponding Author: Rong Wan, rongwan@shou.edu.cn

**Table S1. Types and sources of the data available for this study.**

| Common name<br>(scientific name)                           | Data type          | Year          | Gear type                 | Data source             |
|------------------------------------------------------------|--------------------|---------------|---------------------------|-------------------------|
| Osbeck's Grenadier<br>Anchovy ( <i>Coilia<br/>mystus</i> ) | Published L/F data | 1982          | Drift net and Stow<br>net | Zhang and Hua<br>(1990) |
|                                                            | Published L/F data | 1997-<br>2003 | Drift net                 | Liu et al. (2004)       |
|                                                            | Published L/F data | 2005          | Stow net                  | Guan et al. (2011)      |
|                                                            | Published L/F data | 2009          | Set stow net              | Liu et al. (2012)       |
|                                                            | Published L/F data | 2012          | Trawl                     | Yu (2014)               |
|                                                            | Survey data        | 2018-<br>2020 | Set gill net              | This study              |
| Japanese Grenadier<br>Anchovy ( <i>Coilia<br/>nasus</i> )  | Published L/F data | 2006          | -                         | Guan et al. (2010)      |
|                                                            | Published L/F data | 2011          | Drift net                 | Tian et al. (2014)      |
|                                                            | Survey data        | 2019-<br>2020 | Set gillnet               | This study              |

**Table S2. Summary of the length data and sampling size for *C. mystus* and *C. nasus* in the Yangtze River Estuary used in this paper.**

| <b>Common name<br/>(scientific name)</b> | <b>Year</b>            | <b>Standard length<sup>2</sup> (mm)</b> | <b>Sample size</b> |
|------------------------------------------|------------------------|-----------------------------------------|--------------------|
| Osbeck's Grenadier                       | 1982                   | 74 – 211                                | 464                |
| Anchovy ( <i>Coilia mystus</i> )         | 1997–2003 <sup>1</sup> | 88 – 176                                | 1408               |
|                                          | 2005                   | [110–11] – [205]                        | 201                |
|                                          | 2009                   | [60–70] – [200–210]                     | 1355               |
|                                          | 2012                   | 82 – 175                                | 945                |
|                                          | 2018–2020              | 66 – 212                                | 639                |
| Japanese Grenadier                       | 2006                   | [110–140] – [320–350]                   | 177                |
| Anchovy ( <i>Coilia nasus</i> )          | 2011                   | 228 – 365                               | 180                |
|                                          | 2019–2020              | 82 – 166                                | 160                |

<sup>1</sup> Converted from total length using a factor of 0.88;

<sup>2</sup> the length in the square brackets represent the range of length class.

**Table S3.** The main management measures and the fisheries events of *C. mystus* and *C. nasus*.  
in the Yangtze River Estuary (1960s- ).

| Species                                                          | Year  | Management measures                                                                                                    | Fisheries events                                                                                                                                                                                                                                                                                                                                                                                                                 | Sources              |
|------------------------------------------------------------------|-------|------------------------------------------------------------------------------------------------------------------------|----------------------------------------------------------------------------------------------------------------------------------------------------------------------------------------------------------------------------------------------------------------------------------------------------------------------------------------------------------------------------------------------------------------------------------|----------------------|
| Osbeck's<br>Grenadier<br>Anchovy<br>( <i>Coilia<br/>mystus</i> ) | 1959  | --                                                                                                                     | Reform of fishing boats and nets started                                                                                                                                                                                                                                                                                                                                                                                         | (Zhang and Hua 1990) |
|                                                                  | 1970s | --                                                                                                                     | The fishing effort increased dramatically as the development of the fishing technique and the increase of horse power                                                                                                                                                                                                                                                                                                            | (Zhang and Hua 1990) |
|                                                                  | 1980s | The number of boats and nets for <i>C. mystus</i> fishery was strictly controlled                                      | --                                                                                                                                                                                                                                                                                                                                                                                                                               | (Zhang and Hua 1990) |
|                                                                  | 1999  | --                                                                                                                     | Since other fisheries occupied a large amount of water, e.g., set nets for eels and crab larvae, the actual fishing range was reduced; the gear for <i>C. mystus</i> fishing in the Yangtze River Estuary has changed from drift-gill nets to set-gill nets, of which the interception surface increased, resulting in deepening of the damage to the stock; at the same time, the number of fishing boats was still increasing. | (Ni 1999)            |
|                                                                  | 2002  | The spring fishing moratorium in the Yangtze River Basin launched (4.1-6.30)                                           | --                                                                                                                                                                                                                                                                                                                                                                                                                               | (Anon. 2002)         |
|                                                                  | 2003  | The number of issued fishing licenses was restricted, but the number of nets was not                                   | The number of nets on per boat increased as a result; the Three Gorges Project began to store water, causing the habitat for <i>C. mystus</i> to move inward along with the fresh water frontal surface and increased its catch rate; besides, fishing operations were concentrated in May gradually and further destroyed its spawning stock.                                                                                   | (Zheng 2012)         |
|                                                                  | 2007  | The species was listed in the first batch of "National Key Protected Economic Aquatic Animal and Plant Resources List" | --                                                                                                                                                                                                                                                                                                                                                                                                                               | (Anon. 2007)         |
|                                                                  | 2016  | The fishing ban in the Yangtze River Basin was extended to four months (3.1-6.30)                                      | --                                                                                                                                                                                                                                                                                                                                                                                                                               | (Anon. 2015)         |
|                                                                  | 2019  | Stop of the issuance of                                                                                                | --                                                                                                                                                                                                                                                                                                                                                                                                                               | (Anon. 2018)         |

|                                                    |                                                                                                               |                                                                                                                                                                                                                                                                                                                                                              |                                                                                                                                                                                                                               |
|----------------------------------------------------|---------------------------------------------------------------------------------------------------------------|--------------------------------------------------------------------------------------------------------------------------------------------------------------------------------------------------------------------------------------------------------------------------------------------------------------------------------------------------------------|-------------------------------------------------------------------------------------------------------------------------------------------------------------------------------------------------------------------------------|
|                                                    | special fishing licenses for the two <i>Coilia</i> spp.                                                       |                                                                                                                                                                                                                                                                                                                                                              |                                                                                                                                                                                                                               |
| 2019                                               | The strictest law enforcement action in Chinese history was launched                                          | --                                                                                                                                                                                                                                                                                                                                                           | (Anon. 2019)                                                                                                                                                                                                                  |
| 2020                                               | A ten-year fishing ban in the Yangtze River                                                                   | --                                                                                                                                                                                                                                                                                                                                                           | (Anon. 2020)                                                                                                                                                                                                                  |
| 1960s                                              | The fishing activities on <i>C. nasus</i> in the Yangtze River Estuary has not started.                       | --                                                                                                                                                                                                                                                                                                                                                           | (Tian et al., 2014)                                                                                                                                                                                                           |
| 1980s                                              | The deep-water net was only allowed to operate in some parts of the North Branch in the Yangtze River Estuary | The number of deep-water nets kept increasing; the range extended to most of the waters in the South Branch; a large number of water conservancy construction projects in the middle and lower reaches of the Yangtze River obstructed the reproduction and migration of <i>C. nasus</i> ; the stock declined sharply and the fishing season never appeared. | (Shi and Gong 2003; Liu et al. 2012; Mao et al. 2015)                                                                                                                                                                         |
| Japanese Grenadier Anchovy ( <i>Coilia nasus</i> ) | after 1989                                                                                                    | --                                                                                                                                                                                                                                                                                                                                                           | The stock of <i>C. nasus</i> was overfished by nets for glass eel (mesh 1mm), deep-water nets and other harmful fishing gear. A large number of juveniles were caught led to the exhaustion of the stock. (Shi and Gong 2003) |
|                                                    | he monitoring vessel began investigating the annual catch of <i>C. nasus</i> .                                | Except for 2010, the resources kept declining.                                                                                                                                                                                                                                                                                                               | (Shi and Gong 2003; Mao et al. 2015)                                                                                                                                                                                          |
|                                                    | 2002 - 2003                                                                                                   | The same with <i>C. mystus</i>                                                                                                                                                                                                                                                                                                                               | -- (Zhang et al. 2005; Mao et al. 2015)                                                                                                                                                                                       |
|                                                    | 2004                                                                                                          | The number of fishing license for <i>C. nasus</i> was further reduced; only one month was allowed to fishing operating (4.1-4.30)                                                                                                                                                                                                                            | -- (Liu et al. 2012)                                                                                                                                                                                                          |
|                                                    | 2007 - 2020                                                                                                   | The same with <i>C. mystus</i>                                                                                                                                                                                                                                                                                                                               | --                                                                                                                                                                                                                            |

## References:

- Anonymous. (2002). Trial of spring fishing ban in the Yangtze River Basin. Fisheries Information, 15.
- Anonymous. (2007). List of National Key Protected Economic Aquatic Animal and Plant Resources (First Batch). Beijing: Ministry of Agriculture and Rural Affairs of the People's Republic of China. [http://www.moa.gov.cn/govpublic/YYJ/201006/t20100606\\_1538153.htm](http://www.moa.gov.cn/govpublic/YYJ/201006/t20100606_1538153.htm) [Accessed on 2021-09-01]
- Anonymous. (2015). The Ministry of Agriculture announced the adjustment of the Yangtze River Basin fishing ban system. Beijing: Ministry of Agriculture and Rural Affairs of the People's Republic of China. [http://www.cjyzbgs.moa.gov.cn/tzgg/201904/t20190428\\_6220273.htm](http://www.cjyzbgs.moa.gov.cn/tzgg/201904/t20190428_6220273.htm) [Accessed on 2021-09-01]
- Anonymous. (2018). Announcement of the Ministry of Agriculture and Rural Affairs on Adjusting the Special Fishing Management System in the Yangtze River Basin, [2018] No. 5. Beijing, China. [http://www.moa.gov.cn/govpublicA/CJB/201812/t20181229\\_6165854.htm](http://www.moa.gov.cn/govpublicA/CJB/201812/t20181229_6165854.htm). [Accessed on 2021-09-01]
- Anonymous. (2019). Notice of the Ministry of Agriculture and Rural Affairs on the issuance of the "China Fishery Administration Liangjian 2019 Series Special Law Enforcement Action Plan". Beijing: Ministry of Agriculture and Rural Affairs of the People's Republic of China. [http://www.moa.gov.cn/nybgb/2019/0201903/201905/t20190525\\_6315397.htm](http://www.moa.gov.cn/nybgb/2019/0201903/201905/t20190525_6315397.htm) [Accessed on 2021-09-01]
- Anonymous. (2020). Announcement of the Ministry of Agriculture and Rural Affairs on the Scope and Time of Prohibition of Catch in Key Waters of the Yangtze River Basin. Beijing: Ministry of Agriculture and Rural Affairs of the People's Republic of China. [http://www.fgs.moa.gov.cn/flfg/202002/t20200217\\_6337172.htm](http://www.fgs.moa.gov.cn/flfg/202002/t20200217_6337172.htm) [Accessed on 2021-09-01]
- Guan, W. B., Chen, H. H., and He, W. H. (2011). Reproductive characteristics and condition status of *Coilia mystus* (Linnaeus) in the Changjiang River estuary. Progress in Fishery Sciences, 32(5): 1–9.
- Guan, W. B., Chen, H. H., Ding, H. T., Xuan, F. J., and Dai, X. J. (2010). Reproductive characteristics and conditions of anadromous *Coilia ectenes* (Engraulidae) in Yangtze Estuary. Marine Fisheries, 32(1): 73–81.
- Liu, K., Zhang, M. Y., Xu, D. P., and Shi, W. G. (2004). Studies on resource change and MSY of *Coilia mystus* in the Yangtze River estuary. Journal of Shanghai Ocean University, 13(4): 298–303.
- Liu, S. H., Xu, Z. L., and Tian, F. G. (2012). Study on feeding habit of *Coilia mystus* in Yangtze River Estuary. Journal of Shanghai Ocean University, 21(4): 589–597.
- Liu, S. H., Xu, Z. L., and Tian, F. G. (2012). Study on feeding habit of *Coilia mystus* in Yangtze River Estuary. Journal of Shanghai Ocean University, 21(4): 589–597.
- Mao, C. Z., Jiao, X. M., Zhong, J. S., Hua, W. H., Zhang, X. Y., and Wu, J. X. (2015). Research progress on resource status and protection of *Coilia nasus* in Yangtze River Estuary. Journal

of Huaihai Institute of Technology (Natural Science), 24 (3): 78–83. doi: 10.3969/j.issn.1672-6685.2015.03.018.

Ni, Y. (1999). Fishery resources conservation for *Coilia mystus* in the Changjiang estuary. *Journal of Fishery Sciences of China*, 6(5): 75-77.

Shi, D. L., and Gong, H. X. (2003). Suggestions on the Protection of *Coilia nasus* Resources in the Yangtze River Estuary. *Marine Fisheries*, 2: 96–97.

Tian, S. Q., Tian, Z. Q., Gao, C. X., and Dai, X. J. (2014). Analyzing of annual changes for the stock status of *Coilia nasus* in fishing season in Yangtze River Estuary. *Journal of Shanghai Ocean University*, 23(2): 245–250.

Yu, X. (2014). *Research on biological characteristics of anadromous spawning Coilia mystus in estuary of the Yangtze River*. MSc Thesis, Shanghai: Shanghai Ocean University, 69 pp.

Zhang, G. X., and Hua, J. D. (1990). Changes in the resources of the *Coilia mystus* in the Yangtze River Estuary and estimation of its maximum sustainable yield. *Fisheries Science & Technology Information*, 131–134. doi: 10.16446/j.cnki.1001-1994.1990.05.001.

Zhang, Y. M., Xu, D. P., Liu, K., and Shi, W. G. (2005). Studies on biological characteristics and change of resource of *Coilia nasus* Schlegel in the lower reaches of the Yangtze River. *Resources and Environment in the Yangtze Basin*, 14(6): 694–698.

Zheng, Y. (2012). Evaluation of *Coilia mystus* of the Yangtze River Estuary. *Journal of Anhui Agriculture Science*, 40(35): 17140–17143.
